# Supplementary figures and images for: Predicting mechanisms of action at genetic loci associated with discordant effects on type 2 diabetes and abdominal fat accumulation
Source: eLife journal article supplement (doi:10.7554/elife.79834), 2023-06-05

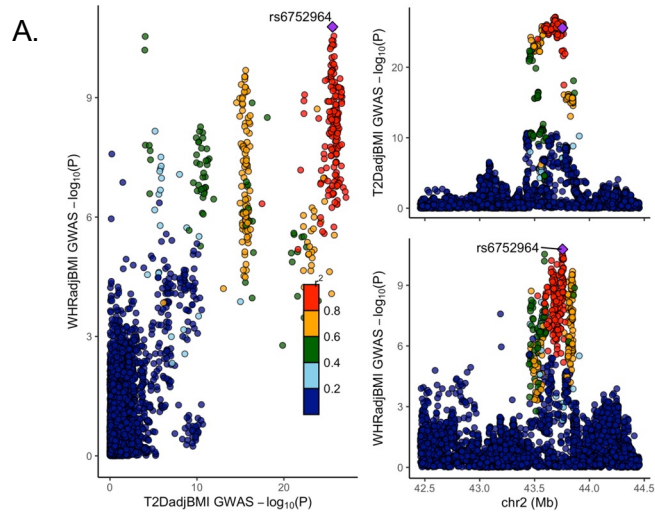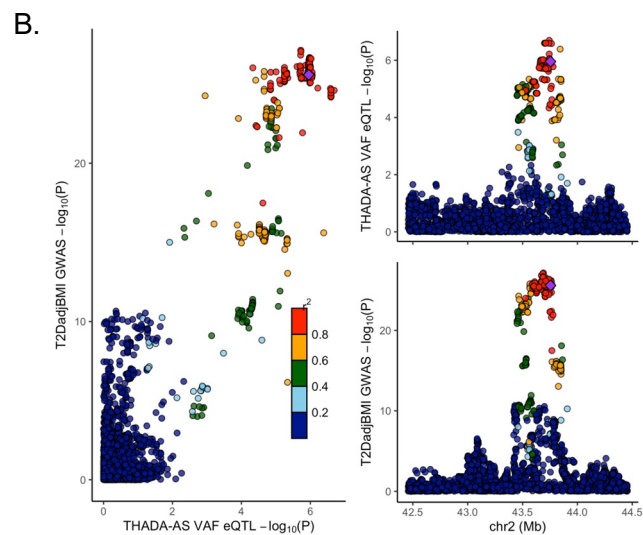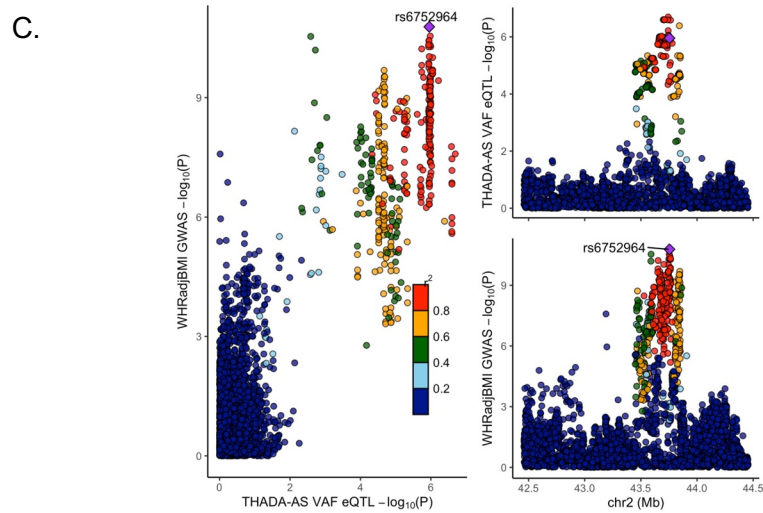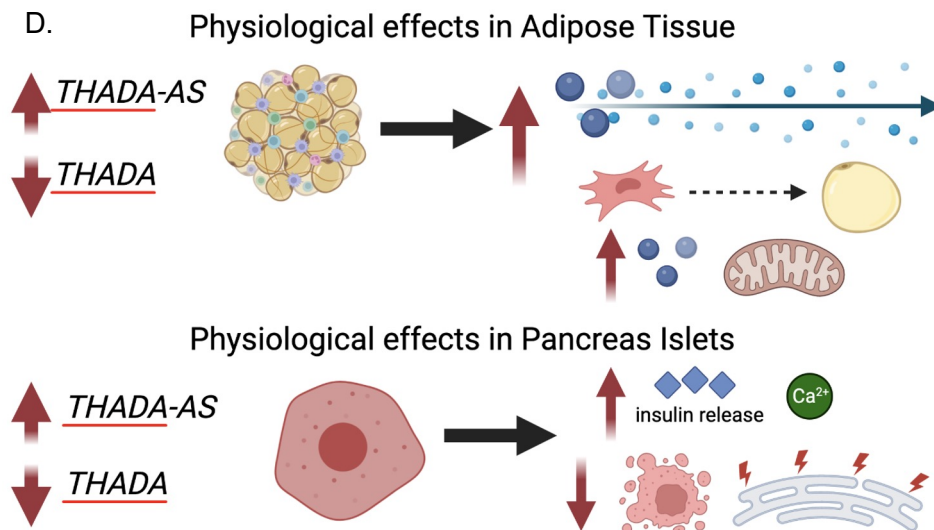

Supplement: supp [file elife-79834-supp-v2.zip]

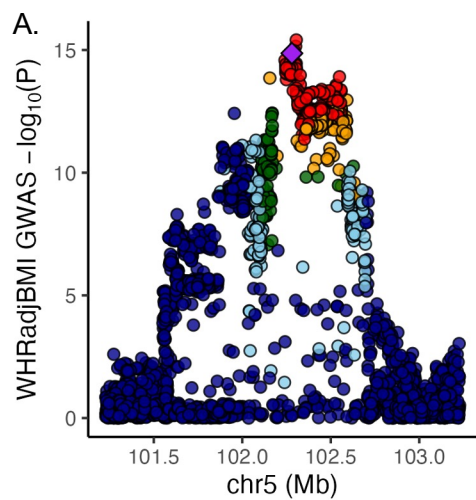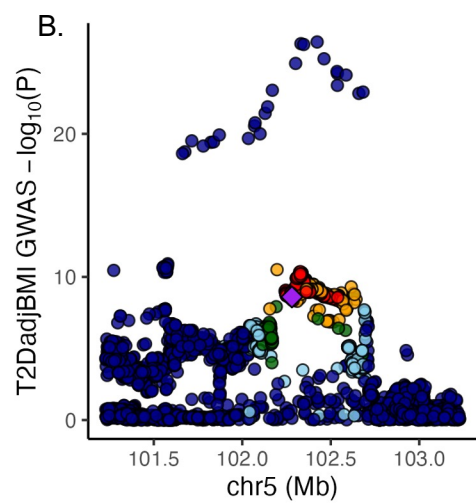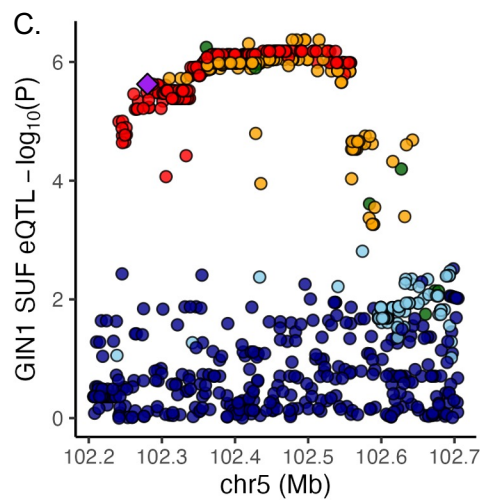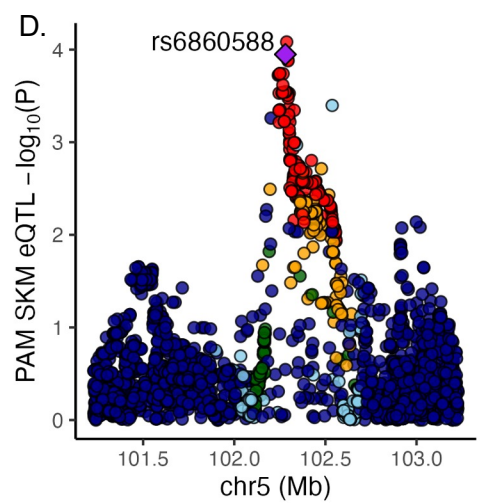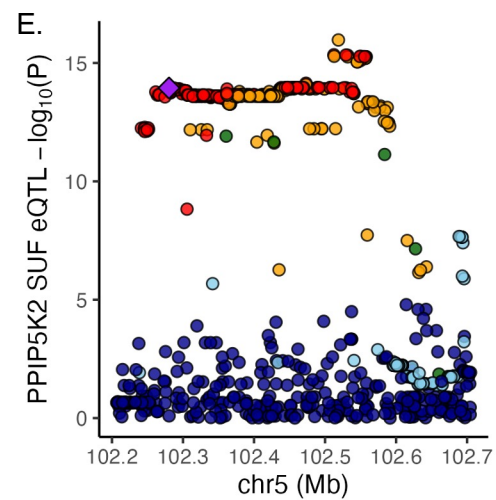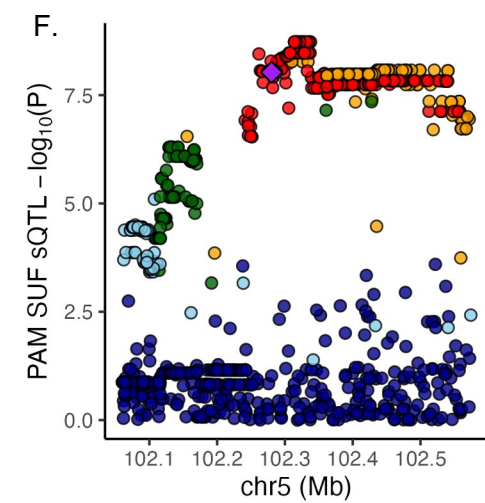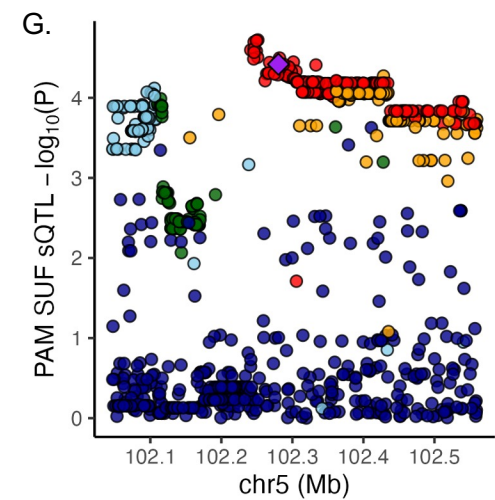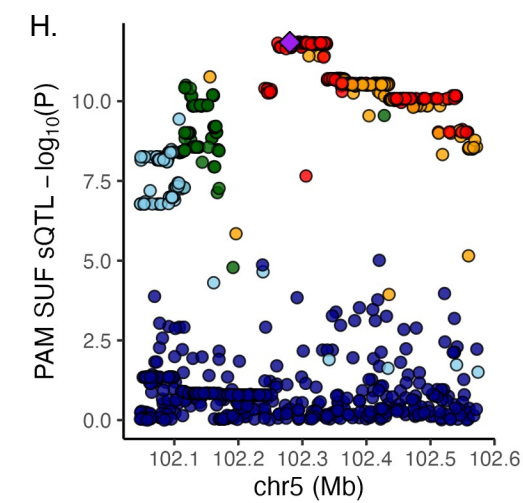

Supplement: supp [file elife-79834-supp-v2.zip]
